# Supplementary material for: Strengthening the success rate of suprapubic aspiration in infants by integrating point-of-care ultrasonography guidance: A parallel-randomized clinical trial
Source: PubMed Central journal article supplement (PMC8282064; doi:10.1371/journal.pone.0254703), 2021-07-15
Supplement: pone.0254703.s003.pdf [file pone.0254703.s003.pdf]

# پروتکل کارآزمایی بالینی مرکز ثبت کارآزمایی بالینی ایران

۱۳۹۹/۰۹/۱۵

**مقایسه میزان موفقیت سه روش نمونه گیری ادرار با کاتتر آسپیراسیون سوپراپوبیک با و بدون گایدنس در نوزادان و شیرخواران کمتر از سه ماه مشکوک به عفونت ادراری**

## چکیده پروتکل

### هدف از مطالعه

تعیین و مقایسه میزان موفقیت سه روش نمونه گیری ادرار با کاتتر آسپیراسیون سوپراپوبیک با و بدون گایدنس در شیرخواران مشکوک به عفونت ادراری

### طراحی

کارآزمایی بالینی دارای گروه کنترل

### نحوه و محل انجام مطالعه

نوزادان و شیرخواران بستری شده در بیمارستان 17 شهریور مشکوک به عفونت ادراری 30 دقیقه پس از شیرخوردن بر اساس بلاک های تصادفی به سه گروه درمانی A, B, C تقسیم بندی میشوند. گروه A: نمونه گیری با کاتترمانه گروه B: نمونه گیری با آسپیراسیون سوپراپوبیک گروه C: نمونه گیری سوپراپوبیک با گاید اولتراسونوگرافی تعداد دفعات تلاش برای نمونه گیری حداکثر سه بار است

### شرکت کنندگان/شرایط ورود و عدم ورود

شرایط ورود: کلیه نوزادان و شیرخواران کوچکتر از سه ماه مشکوک به عفونت ادراری شرایط عدم ورود: عفونت پوست محل مورد بررسی اختلالات آناتومیک دستگاه ادراری اختلالات خونریزی دهنده و ترومبوسیتونی اصلاح نشده شکم و احشا شکمی برجسته

### گروه های مداخله

گروه A: نمونه گیری با کاتترمانه گروه B: نمونه گیری با آسپیراسیون سوپراپوبیک گروه C: نمونه گیری سوپراپوبیک با گاید اولتراسونوگرافی

### متغیرهای پیامد اصلی

میزان موفقیت کلی هر روش نمونه گیری ادرار

## اطلاعات تماس ثبت کننده

### نام

حمیدرضا بادلی

### نام سازمان / نهاد

دانشگاه علوم پزشکی گیلان، مرکز آموزشی درمانی 17 شهریور رشت

### کشور

جمهوری اسلامی ایران

### تلفن

9523 1322 13 98+

### آدرس ایمیل

badeli@gums.ac.ir

### وضعیت بیمار گیری

بیمار گیری تمام شده

### منبع مالی

### تاریخ شروع بیمار گیری مورد انتظار

2017-12-22, 1396/10/01

### تاریخ پایان بیمار گیری مورد انتظار

2018-12-22, 1397/10/01

### تاریخ شروع بیمارگیری تحقق یافته

خالی

### تاریخ پایان بیمارگیری تحقق یافته

خالی

### تاریخ خاتمه کارآزمایی

خالی

### عنوان علمی کارآزمایی

مقایسه میزان موفقیت سه روش نمونه گیری ادرار با کاتتر آسپیراسیون سوپراپوبیک با و بدون گایدنس در نوزادان و شیرخواران کمتر از سه ماه مشکوک به عفونت ادراری

### عنوان عمومی کارآزمایی

مقایسه میزان موفقیت سه روش نمونه گیری ادرار با کاتتر آسپیراسیون سوپراپوبیک با و بدون گایدنس در نوزادان و شیرخواران کمتر از سه ماه مشکوک به عفونت ادراری

### هدف اصلی مطالعه

تشخیصی

### شرایط عمده ورود و عدم ورود به مطالعه

شرایط عمده ورود به مطالعه قبل از تصادفی سازی:

کلیه نوزادان و شیرخواران کوچکتر از سه ماه مشکوک به عفونت

## اطلاعات عمومی

### علت بروز رسانی

### نام اختصاری

### اطلاعات ثبت در مرکز

شماره ثبت کارآزمایی در مرکز: IRCT20090111001545N3

تاریخ تایید ثبت در مرکز: 09-04-2018, 1397/01/20

زمان بندی ثبت: registered\_while\_recruiting

آخرین بروز رسانی: 09-04-2018, 1397/01/20

تعداد بروز رسانی ها: 0

تاریخ تایید ثبت در مرکز

2018-04-09, 1397/01/20

توصیف کد ICD-10  
Neonatal urinary tract infection

## متغیر پیامد اولیه

### 1

#### شرح متغیر پیامد

میزان موفقیت کلی هر روش نمونه گیری ادرار

#### مقاطع زمانی اندازه گیری

سه بار

#### نحوه اندازه گیری متغیر

کاتترگذاری گذاری-آسپیراسیون سوپراپوبیک بدون گاید سونوگرافی-  
آسپیران سوپراپوبیک با گاید سونوگرافی

## متغیر پیامد ثانویه

خالی

## گروه های مداخله

### 1

#### شرح مداخله

گروه مداخله اول: گروهی که نمونه ادرار توسط کاتترگذاری ممانه جمع  
آوری میشود

#### طبقه بندی

تشخیصی

### 2

#### شرح مداخله

گروه مداخله دوم: گروهی که نمونه ادرار توسط آسپیراسیون  
سوپراپوبیک جمع آوری میشود

#### طبقه بندی

تشخیصی

### 3

#### شرح مداخله

گروه مداخله سوم: گروهی که نمونه ادرار توسط آسپیراسیون  
سوپراپوبیک همراه گایدسونوگرافی جمع آوری میگردد

#### طبقه بندی

تشخیصی

## مراکز بیمار گیری

### 1

#### مرکز بیمار گیری

#### نام مرکز بیمار گیری

بیمارستان کودکان 17-شهربور

#### نام کامل فرد مسوول

حمیدرضا بادلی

#### آدرس خیابان

بیمارستان 17 شهربور-خیابان نامجو-خیابان شهید سیادتی-روبروی

پارک شهر

#### شهر

رشت

#### استان

گیلان

#### کد پستی

ادراری

شرایط عمده عدم ورود به مطالعه قبل از تصادفی سازی:

عفونت پوست محل مورد بررسی اختلالات آناتومیک دستگاه ادراری

اختلالات خونریزی دهنده و ترومبوسیتوپنی اصلاح نشده شکم و احشا

شکمی برجسته

### سن

از سن 1 روزه تا سن 3 ماهه

### جنسیت

هر دو

### فاز مطالعه

2-3

### گروه های کور شده در مطالعه

اطلاعات موجود نیست

### حجم نمونه کل

حجم نمونه پیش بینی شده: 114

### تصادفی سازی (نظر محقق)

اختصاص تصادفی به گروه های مداخله و کنترل

### توصیف نحوه تصادفی سازی

نمونه گیری به روش تصادفی خواهد بود، نوزادان و شیرخواران بر  
اساس block های تصادفی به سه گروه درمانی تقسیم بندی می شوند

### کور سازی (به نظر محقق)

کور نشده است

### توصیف نحوه کور سازی

دارو نما

ندارد

### اختصاص به گروه های مطالعه

موازی

### سایر مشخصات طراحی مطالعه

## کد ثبت در سایر مراکز ثبت بین المللی

خالی

## تاییدیه کمیته های اخلاق

### 1

#### کمیته اخلاق

#### نام کمیته اخلاق

کمیته اخلاق دانشگاه علوم پزشکی گیلان

#### آدرس خیابان

بیمارستان 17 شهربور، خیابان شهید سیادتی، خیابان نامجو

#### شهر

رشت

#### استان

گیلان

#### کد پستی

4144654839

#### تاریخ تایید

1395/09/25, 2016-12-15

#### کد کمیته اخلاق

IR.GUMS.REC.1395.365

## بیماری های (موضوعات) مورد مطالعه

### 1

#### شرح

میزان موفقیت روش های نمونه گیری ادرار

#### کد ICD-10

P39.3

کودکان  
آدرس خیابان  
بیمارستان 17 شهريور. خیابان شهيد سيادتي. خیابان نامجو  
شهر  
رشت  
استان  
گیلان  
کد پستی  
4144654839  
تلفن  
9002 3336 13 98+  
فکس  
9070 3336 13 98+  
ایمیل  
badeli@gums.ac.ir

## فرد مسوول پاسخگویی علمی مطالعه

اطلاعات تماس  
نام سازمان / نهاد  
دانشگاه علوم پزشکی رشت  
نام کامل فرد مسوول  
حمیدرضا بادلی  
موقعیت شغلی  
استادیار  
آخرین مدرک تحصیلی  
فوق تخصص  
سایر حوزه‌های کاری/تخصص‌ها  
کودکان  
آدرس خیابان  
بیمارستان 17 شهريور. خیابان شهيد سيادتي. خیابان نامجو  
شهر  
رشت  
استان  
گیلان  
کد پستی  
4144654839  
تلفن  
9391 3336 13 98+  
فکس  
ایمیل  
badeli@gums.ac.ir

## فرد مسوول به روز رسانی اطلاعات

اطلاعات تماس  
نام سازمان / نهاد  
دانشگاه علوم پزشکی رشت  
نام کامل فرد مسوول  
حمیدرضا بادلی  
موقعیت شغلی  
دانشیار  
آخرین مدرک تحصیلی  
فوق تخصص  
سایر حوزه‌های کاری/تخصص‌ها  
کودکان  
آدرس خیابان  
بیمارستان 17 شهريور. خیابان شهيد سيادتي. خیابان نامجو  
شهر  
رشت  
استان  
گیلان

41144654839  
تلفن  
9002 3336 13 98+  
فکس  
9070 3336 13 98+  
ایمیل  
17shahrivar@gums.ac.ir  
آدرس صفحه وب

## حمایت کنندگان / منابع مالی

1

حمایت کننده مالی  
نام سازمان / نهاد  
دانشگاه علوم پزشکی رشت  
نام کامل فرد مسوول  
شادمان نعمتی  
آدرس خیابان  
بیمارستان 17 شهريور. خیابان شهيد سيادتي. خیابان نامجو  
شهر  
رشت  
استان  
گیلان  
کد پستی  
4144654839  
تلفن  
9002 3336 13 98+  
فکس  
ایمیل  
research@gums.ac.ir  
آدرس صفحه وب

ردیف بودجه  
کد بودجه  
آیا منبع مالی همان سازمان یا نهاد حمایت کننده مالی است؟  
بلی  
عنوان منبع مالی  
دانشگاه علوم پزشکی رشت  
درصد تامین مالی مطالعه توسط این منبع  
100  
بخش عمومی یا خصوصی  
عمومی  
مبدا اعتبار از داخل یا خارج کشور  
داخلی  
طبقه بندی منابع اعتبار خارجی  
خالی  
کشور مبدا  
کشور مبدا  
طبقه بندی موسسه تامین کننده اعتبار  
دانشگاهی

## فرد مسوول پاسخگویی عمومی کارآزمایی

اطلاعات تماس  
نام سازمان / نهاد  
دانشگاه علوم پزشکی رشت  
نام کامل فرد مسوول  
حمیدرضا بادلی  
موقعیت شغلی  
استادیار  
آخرین مدرک تحصیلی  
فوق تخصص  
سایر حوزه‌های کاری/تخصص‌ها

به دلیل مسایل اخلاقی و محرمانه بودن اطلاعات  
**پروتکل مطالعه**  
خیر - برنامه‌ای برای انتشار آن وجود ندارد  
**نقشه آنالیز آماری**  
خیر - برنامه‌ای برای انتشار آن وجود ندارد  
**فرم رضایتنامه آگاهانه**  
خیر - برنامه‌ای برای انتشار آن وجود ندارد  
**گزارش مطالعه بالینی**  
خیر - برنامه‌ای برای انتشار آن وجود ندارد  
**کدهای استفاده شده در آنالیز**  
خیر - برنامه‌ای برای انتشار آن وجود ندارد  
**نظام دسته‌بندی داده (دیکشنری داده)**  
خیر - برنامه‌ای برای انتشار آن وجود ندارد

**کد پستی**  
414465839  
**تلفن**  
9002 3336 13 98+  
**ایمیل**  
badeli@gums.ac.ir

## **برنامه انتشار**

**فایل داده شرکت کنندگان (IPD)**  
خیر - برنامه‌ای برای انتشار آن وجود ندارد  
**توجه/علت عدم تصمیم/عدم انتشار IPD**
